# Supplementary material for: SARS-CoV-2 outbreak in a tri-national urban area is dominated by a B.1 lineage variant linked to a mass gathering event
Source: PLOS journal article supplement (doi:10.1371/journal.ppat.1009374), 2021-03-19
Supplement: S3 (10.1371/journal.ppat.1009374.s003) [file journal.ppat.1009374.s003.pdf]

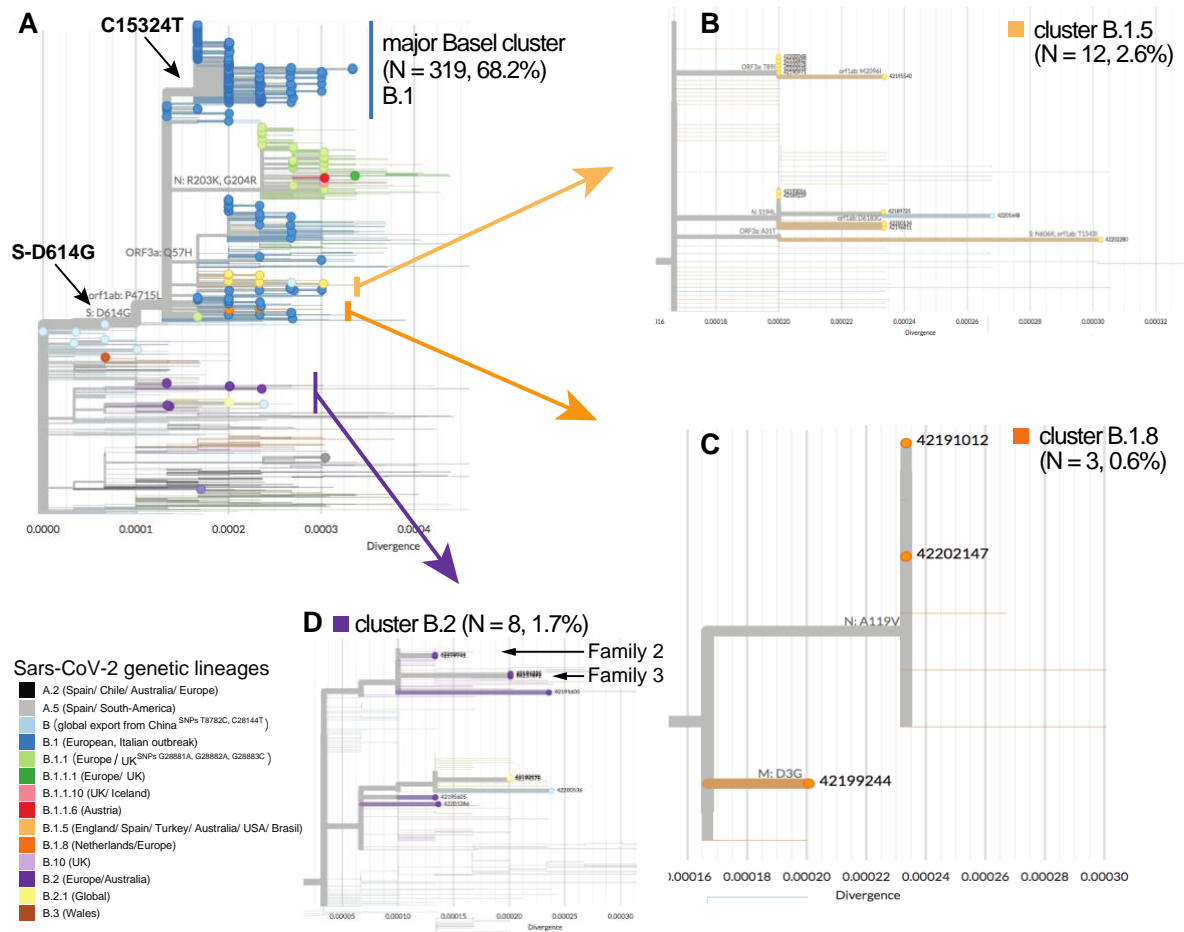

**Figure S3. Divergence tree and zoom into additional sequence clusters, which did not result in large community spread.** **A.** Isolates from Basel area cohort in global context. **B.** A small clade assigned to B.1.5 consists of two clusters with an accumulation of samples from Basel. **C.** Cluster within lineage B.1.8 with two Basel samples without known epidemiological link. **D.** Two family cluster within lineage B.2 that did not spread further into the Basel community.
