# Supplementary material for: SARS-CoV-2 outbreak in a tri-national urban area is dominated by a B.1 lineage variant linked to a mass gathering event
Source: PLoS Pathog. 2021 Mar 19;17(3):e1009374. doi: 10.1371/journal.ppat.1009374 (PMC8011817; doi:10.1371/journal.ppat.1009374)
Supplement: S5 Table — (TSV) [file ppat.1009374.s011.tsv]

Author	n (strains)	publication title	journal	publication URL	strains
Cherng-Lih Perng et al	12	unknown	unknown	unknown	Taiwan/TSGH-37/2020,Taiwan/TSGH-32/2020,Taiwan/TSGH-26/2020,Taiwan/TSGH-01/2020,Taiwan/TSGH-17/2020,Taiwan/TSGH-36/2020,Taiwan/TSGH-27/2020,Taiwan/TSGH-29/2020,Taiwan/TSGH-04/2020,Taiwan/TSGH-08/2020,Taiwan/TSGH-12/2020,Taiwan/TSGH-07/2020
Caly L. et al A	2	unknown	unknown	unknown	Australia/VIC15/2020,Australia/VIC588/2020
Weijun Chen et al	2	Genomic characterisation and epidemiology of 2019 novel coronavirus: implications for virus origins and receptor binding	unknown	https://dx.doi.org/10.1016/S0140-6736(20)30251-8	Wuhan/WH01/2019,Wuhan/WH04/2020
Wenjie Tan et al A	1	A Novel Coronavirus from Patients with Pneumonia in China, 2019	unknown	https://dx.doi.org/10.1056/NEJMoa2001017	Wuhan/IVDC-HB-05/2019
Wang et al	1	Nosocomial outbreak of COVID-19 pneumonia in Wuhan, China	unknown	http://erj.ersjournals.com/lookup/doi/10.1183/13993003.00544-2020	Wuhan/WHUH021/2020
Shengyue Wang et al	12	unknown	unknown	unknown	Shanghai/SH0093/2020,Shanghai/SH0094/2020,Shanghai/SH0010/2020,Shanghai/SH0034/2020,Shanghai/SH0004/2020,Shanghai/SH0074/2020,Shanghai/SH0079/2020,Shanghai/SH0033/2020,Shanghai/SH0060/2020,Shanghai/SH0053/2020,Shanghai/SH0012/2020,Shanghai/SH0086/2020
Bin Fang et al	4	Genome-wide data inferring the evolution and population demography of the novel pneumonia coronavirus (SARS-CoV-2)	unknown	https://dx.doi.org/10.1101/2020.03.04.976662	Wuhan/HBCDC-HB-01/2019,Wuhan/HBCDC-HB-02/2019,Tianmen/HBCDC-HB-07/2020,Wuhan/HBCDC-HB-03/2019
Lili Ren et al A	1	unknown	unknown	unknown	Wuhan/IPBCAMS-WH-01/2019
Peng Zhou et al	5	unknown	unknown	unknown	Wuhan/WIV07/2019,Wuhan/WIV05/2019,Wuhan/WIV02/2019,Wuhan/WIV06/2019,Wuhan/WIV04/2019
Pilailuk et al A	29	unknown	unknown	unknown	Thailand/Bangkok_323/2020,Thailand/Bangkok_168/2020,Thailand/Bangkok_580/2020,Thailand/Bangkok_237/2020,Thailand/Nonthaburi_193/2020,Thailand/Bangkok_238/2020,Thailand/Bangkok_1716/2020,Thailand/Bangkok_2974/2020,Thailand/NIH-2492-2/2020,Thailand/NIH-2420/2020,Thailand/NIH-2488/2020,Thailand/Bangkok_2489/2020,Thailand/NIH-2472/2020,Thailand/Nonthaburi_2472/2020,Thailand/Bangkok_2294/2020,Thailand…
Mak TM et al	31	unknown	unknown	unknown	Singapore/165/2020,Singapore/383/2020,Singapore/187/2020,Singapore/15/2020,Singapore/20/2020,Singapore/220/2020,Singapore/181/2020,Singapore/304/2020,Singapore/186/2020,Singapore/17/2020,Singapore/246/2020,Singapore/36/2020,Singapore/175/2020,Singapore/12Clin/2020,Singapore/16/2020,Singapore/188/2020,Singapore/21/2020,Singapore/14Clin/2020,Singapore/43/2020,Singapore/315/2020,Singapore/51/2020,Si…
Lili Ren et al B	3	Genomic Diversity of Severe Acute Respiratory Syndrome<89><db><d2>Coronavirus 2 in Patients With Coronavirus Disease 2019	unknown	https://dx.doi.org/10.1093/cid/ciaa203/5780800	Wuhan/IPBCAMS-WH-03/2019,Wuhan/IPBCAMS-WH-02/2019,Wuhan/IPBCAMS-WH-04/2019
Rodpan et al	16	unknown	unknown	unknown	Thailand/SI200615-NT/2020,Thailand/SI202769-NT/2020,Thailand/SI202205-NT/2020,Thailand/SI200468-NT/2020,Thailand/SI202620-NT/2020,Thailand/SI202872-NT/2020,Thailand/SI203285-NT/2020,Thailand/SI205457-NST/2020,Thailand/SI200383-NT/2020,Thailand/SI200893-NT/2020,Thailand/SI200478-NST/2020,Thailand/SI201712-NT/2020,Thailand/SI204487-NT/2020,Thailand/SI200040-NT/2020,Thailand/SI200433-NT/2020,Thailan…
Wenjie Tan et al B	1	unknown	unknown	unknown	Wuhan/IVDC-HB-GX02/2019
Siyuan Yang et al	4	unknown	unknown	unknown	Beijing/DT-travelIT05/2020,Beijing/DT-travelUK02/2020,Beijing/DT-travelHU03/2020,Beijing/DT-travelIT02/2020
Jun Li et al	3	unknown	unknown	unknown	Hangzhou/HZCDC6706/2020,Hangzhou/HZCDC0025/2020,Hangzhou/HZCDC0090/2020
Javed et al	1	Insights into The Codon Usage Bias of 13 Severe Acute Respiratory Syndrome Coronavirus 2 (SARS-CoV-2) Isolates from Different Geo-locations	unknown	http://biorxiv.org/lookup/doi/10.1101/2020.04.01.019463	Pakistan/Gilgit1/2020
Rockett R et al	3	Revealing COVID-19 Transmission by SARS-CoV-2 Genome Sequencing and Agent Based Modelling	unknown	https://dx.doi.org/10.1101/2020.04.19.048751	Australia/NSW02/2020,Australia/NSW10/2020,Australia/NSW08/2020
Hangping Yao et al	3	Spread of SARS-CoV-2 in the Icelandic Population	unknown	https://dx.doi.org/10.1056/NEJMoa2006100	Hangzhou/ZJU-06/2020,Hangzhou/ZJU-02/2020,Hangzhou/ZJU-04/2020
Wang Xiaoguang et al	1	unknown	unknown	unknown	Lishui/LS111/2020
Bosheng Li et al	3	unknown	unknown	unknown	Guangdong/20SF195/2020,Guangdong/20SF254/2020,Guangdong/20SF630/2020
Fatma Bayrakdar et al A	19	Phylogenetic Analysis of SARS-CoV-2 Genomes in Turkey	unknown	https://dx.doi.org/10.1101/2020.05.15.095794	Turkey/HSGM-5770/2020,Turkey/HSGM-5516/2020,Turkey/HSGM-4598/2020,Turkey/HSGM-8010/2020,Turkey/HSGM-8992/2020,Turkey/HSGM-7718/2020,Turkey/HSGM-5769/2020,Turkey/HSGM-8001/2020,Turkey/HSGM-5624/2020,Turkey/HSGM-8003/2020,Turkey/HSGM-10241/2020,Turkey/HSGM-4505/2020,Turkey/HSGM-4236/2020,Turkey/HSGM-8975/2020,Turkey/HSGM-4701/2020,Turkey/HSGM-5711/2020,Turkey/HSGM-8968/2020,Turkey/HSGM-8990/2020,Tu…
Xianding Deng et al A	5	unknown	unknown	unknown	USA/CA-SCCPHD-UC106/2020,USA/CA-SCCPHD-UC105/2020,USA/CA-SCCPHD-UC108/2020,USA/CA-SCCPHD-UC103/2020,USA/CA-SCCPHD-UC104/2020
Baowen Du et al	35	unknown	unknown	unknown	Wuhan/HB-WHCM-107/2020,Wuhan/HB-WH3-186/2020,Sichuan/SC-GA-066/2020,Wuhan/HB-WH1-126/2020,Wuhan/HB-WH5-238/2020,Wuhan/HB-WH4-199/2020,Sichuan/SC-PHCC2-045/2020,Sichuan/SC-PHCC2-050/2020,Wuhan/HB-WH3-174/2020,Sichuan/SC-MY-060/2020,Wuhan/HB-WH3-187/2020,Sichuan/SC-PHCC2-052/2020,Wuhan/HB-WHCM-101/2020,Wuhan/HB-WH4-212/2020,Wuhan/HB-WHCM-121/2020,Wuhan/HB-WH4-196/2020,Wuhan/HB-WH4-193/2020,Sichuan/…
Zeinali et al	1	unknown	unknown	unknown	Iran/HGRC-01-IPI-8206/2020
Sirous Zeinali et al	1	unknown	unknown	unknown	Iran/KHGRC-1.1-IPI-8206/2020
Potdar V et al A	4	unknown	unknown	unknown	India/NIV-1738/2020,India/NIV-4369/2020,India/NIV-2810/2020,India/NIV-4130/2020
Wenjie Tan et al C	1	Mutations, Recombination and Insertion in the Evolution of 2019-nCoV	unknown	https://dx.doi.org/10.1101/2020.02.29.971101	Shandong/IVDC-SD-001/2020
Elizabeth Batty et al A	12	unknown	unknown	unknown	Thailand/Bangkok-CONI-0110/2020,Thailand/Bangkok-CONI-0143/2020,Thailand/Bangkok-CONI-0154/2020,Thailand/Bangkok-CONI-0136/2020,Thailand/Bangkok-CONI-0106/2020,Thailand/Bangkok-CONI-0150/2020,Thailand/Bangkok-CONI-0139/2020,Thailand/Bangkok-CONI-0131/2020,Thailand/Bangkok-CONI-0107/2020,Thailand/Bangkok-CONI-0133/2020,Thailand/Bangkok-CONI-0128/2020,Thailand/Bangkok-0073/2020
Pragya D. Yadav et al A	8	Genomic analysis of SARS-CoV-2 strains among Indians returning from Italy, Iran & China, & Italian tourists in India	unknown	http://www.ijmr.org.in/article.asp?issn=0971-5916;year=2020;volume=151;issue=2;spage=255;epage=260;aulast=Potdar	India/1125/2020,India/1652/2020,India/1104/2020,India/1093/2020,India/1100/2020,India/1621/2020,India/1616/2020,India/3239/2020
Chandima Jeewandara et al	1	unknown	unknown	unknown	SriLanka/COV38/2020
Ahmad Abou Tayoun et al	23	Genomic surveillance and phylogenetic analysis reveal multiple introductions of SARS-CoV-2 into a global travel hub in the Middle East	unknown	https://dx.doi.org/10.1101/2020.05.06.080606	UnitedArabEmirates/L0904/2020,UnitedArabEmirates/L0184/2020,UnitedArabEmirates/L4682/2020,UnitedArabEmirates/L6627/2020,UnitedArabEmirates/L2409/2020,UnitedArabEmirates/L068/2020,UnitedArabEmirates/L0231/2020,UnitedArabEmirates/L5630/2020,UnitedArabEmirates/L4280/2020,UnitedArabEmirates/L6599/2020,UnitedArabEmirates/L4184/2020,UnitedArabEmirates/L9766/2020,UnitedArabEmirates/L1014/2020,UnitedArab…
Fatma Bayrakdar et al B	10	unknown	unknown	unknown	Turkey/HSGM-1458/2020,Turkey/HSGM-1495/2020,Turkey/HSGM-6204/2020,Turkey/HSGM-1490/2020,Turkey/HSGM-1009/2020,Turkey/HSGM-1476/2020,Turkey/HSGM-1444/2020,Turkey/HSGM-4698/2020,Turkey/HSGM-7668/2020,Turkey/HSGM-1452/2020
Alexandra Gerber et al	8	unknown	unknown	unknown	Brazil/MT0225/2020,Brazil/GO0208/2020,Brazil/MG0215/2020,Brazil/SC0244/2020,Brazil/RS0242/2020,Brazil/RJ0247/2020,Brazil/MG0214/2020,Brazil/MG0212/2020
Kuo-Chien Tsao et al	13	unknown	unknown	unknown	Taiwan/CGMH-CGU-21/2020,Taiwan/CGMH-CGU-04/2020,Taiwan/CGMH-CGU-03/2020,Taiwan/CGMH-CGU-06/2020,Taiwan/CGMH-CGU-08/2020,Taiwan/CGMH-CGU-09/2020,Taiwan/CGMH-CGU-02/2020,Taiwan/CGMH-CGU-01/2020,Taiwan/CGMH-CGU-22/2020,Taiwan/CGMH-CGU-19/2020,Taiwan/CGMH-CGU-13/2020,Taiwan/CGMH-CGU-18/2020,Taiwan/CGMH-CGU-12/2020
Alireza Eshaghi et al	16	unknown	unknown	unknown	Canada/ON_PHL3318/2020,Canada/ON_PHL5472/2020,Canada/ON_PHL2273/2020,Canada/ON_PHL0142/2020,Canada/ON_PHL0052/2020,Canada/ON_PHL4181/2020,Canada/ON_PHL2445/2020,Canada/ON_PHL3741/2020,Canada/ON_PHLH6415/2020,Canada/ON_PHL2259/2020,Canada/ON_PHL8751/2020,Canada/ON_PHL5930/2020,Canada/ON_PHL3680/2020,Canada/ON_PHL3350/2020,Canada/ON_PHL8539/2020,Canada/ON_PHL6922/2020
Ortwin Adams et al	20	Genetic structure of SARS-CoV-2 in Western Germany reflects clonal superspreading and multiple independent introduction events	unknown	https://dx.doi.org/10.1101/2020.04.25.20079517	Germany/NRW-46/2020,Germany/NRW-35/2020,Germany/NRW-09/2020,Germany/NRW-50/2020,Germany/NRW-10/2020,Germany/NRW-04/2020,Germany/NRW-07/2020,Germany/NRW-08/2020,Germany/NRW-01/2020,Germany/NRW-05/2020,Germany/NRW-03/2020,Germany/NRW-02-1/2020,Germany/NRW-15/2020,Germany/NRW-33/2020,Germany/NRW-34/2020,Germany/NRW-38/2020,Germany/NRW-28/2020,Germany/NRW-45/2020,Germany/NRW-44/2020,Germany/NRW-51/20…
Bixing Huang et al	3	unknown	unknown	unknown	Australia/QLD09/2020,Australia/QLDID922/2020,Australia/QLDID923/2020
Eden J-S et al	5	Revealing COVID-19 Transmission by SARS-CoV-2 Genome Sequencing and Agent Based Modelling	unknown	https://dx.doi.org/10.1101/2020.04.19.048751	Australia/NSW07/2020,Australia/NSW05/2020,Australia/NSW04/2020,Australia/NSW01/2020,Australia/NSW03/2020
Fahd Al-Mulla et al	8	unknown	unknown	unknown	Kuwait/KU17/2020,Kuwait/KU09/2020,Kuwait/KU12/2020,Kuwait/KU18/2020,Kuwait/KU001/2020,Kuwait/KU005/2020,Kuwait/KU008/2020,Kuwait/KU006/2020
Zhibing Yun et al	1	unknown	unknown	unknown	Sweden/20-04631/2020
Harrigan et al A	12	unknown	unknown	unknown	Canada/BC_13297/2020,Canada/BC_17397/2020,Canada/BC_69243/2020,Canada/BC_02421/2020,Canada/BC_4143868/2020,Canada/BC_66353/2020,Canada/BC_8606204/2020,Canada/BC_4122951/2020,Canada/BC_3972884/2020,Canada/BC_8150537/2020,Canada/BC_6981299/2020,Canada/BC_9345042/2020
Monica Galiano et al	17	Preliminary analysis of SARS-CoV-2 importation & establishment of UK transmission lineages	unknown	https://virological.org/t/preliminary-analysis-of-sars-cov-2-importation-establishment-of-uk-transmission-lineages/507	England/200960041/2020,England/01/2020,England/02/2020,England/20130073404/2020,England/20130087004/2020,England/20102088002/2020,England/20129163304/2020,England/20109056406/2020,England/200990006/2020,England/20132079204/2020,England/200981386/2020,England/20100005406/2020,England/20100004706/2020,England/20099107406/2020,England/20128040804/2020,England/20128011204/2020,England/20124003702/2020
PHE Covid Sequencing Team et al	33	unknown	unknown	unknown	England/20099000304/2020,England/201090771/2020,England/201060202/2020,England/20098017804/2020,England/20099071904/2020,England/20119007704/2020,England/20080000204/2020,England/20072030304/2020,England/20079022704/2020,England/20086030304/2020,England/20088028304/2020,England/20084031204/2020,England/20099048404/2020,England/20102003604/2020,England/20122018002/2020,England/201061453/2020,Engla…
Gopi Patel et al	1	Introductions and early spread of SARS-CoV-2 in the New York City area	unknown	https://dx.doi.org/10.1101/2020.04.08.20056929	USA/NY1-PV08001/2020
Harrigan et al B	1	A doubt of multiple introduction of SARS-CoV-2 in Italy: A preliminary overview	unknown	https://dx.doi.org/10.1002/jmv.25773	Canada/BC_37_0-2/2020
To et al	10	unknown	unknown	unknown	HongKong/HKU-905a/2020,HongKong/HKU-904a/2020,HongKong/HKU-907b/2020,HongKong/HKU-907a/2020,HongKong/HKU-913a/2020,HongKong/HKU-902a/2020,HongKong/HKU-902b/2020,HongKong/HKU-908a/2020,HongKong/HKU-908b/2020,HongKong/HKU-911a/2020
Matt Storey et al A	1	An emergent clade of SARS-CoV-2 linked to returned travellers from Iran	unknown	https://dx.doi.org/10.1101/2020.03.15.992818	NewZealand/01/2020
Caly L. et al B	24	Tracking the COVID-19 pandemic in Australia using genomics	unknown	https://dx.doi.org/10.1101/2020.05.12.20099929	Australia/VIC262/2020,Australia/VIC97/2020,Australia/VIC13/2020,Australia/VIC07/2020,Australia/VIC304/2020,Australia/VIC138/2020,Australia/VIC08/2020,Australia/VIC159/2020,Australia/VIC02/2020,Australia/VIC203/2020,Australia/VIC03/2020,Australia/VIC14/2020,Australia/VIC93/2020,Australia/VIC593/2020,Australia/VIC278/2020,Australia/VIC91/2020,Australia/VIC258/2020,Australia/VIC113/2020,Australia/VI…
Shaikh Terkis Islam Pavel et al	1	Phylogenetic Analysis of SARS-CoV-2 Genomes in Turkey	unknown	https://dx.doi.org/10.1101/2020.05.15.095794	Turkey/ERAGEM-001/2020
Samira Al-Maruqi et al	19	unknown	unknown	unknown	Oman/RESP-20-2181/2020,Oman/RESP-20-1189/2020,Oman/RESP-20-837/2020,Oman/RESP-20-1857/2020,Oman/RESP-20-797/2020,Oman/RESP-20-4736/2020,Oman/RESP-20-2631/2020,Oman/RESP-20-1976/2020,Oman/RESP-20-2850/2020,Oman/RESP-20-2857/2020,Oman/RESP-20-4400/2020,Oman/RESP-20-3700/2020,Oman/RESP-20-4252/2020,Oman/RESP-20-3515/2020,Oman/RESP-20-4153/2020,Oman/RESP-20-4810/2020,Oman/RESP-20-3080/2020,Oman/RESP-…
Pragya D. Yadav et al B	2	Phylogenetic clustering of the Indian SARS-CoV-2 genomes reveals the presence of distinct clades of viral haplotypes among states	unknown	https://www.biorxiv.org/content/10.1101/2020.05.28.122143v1	India/1617/2020,India/1135/2020
Shevtsov et al	1	unknown	unknown	unknown	Kazakhstan/NCB-1/2020
Nato Kotaria et al	4	unknown	unknown	unknown	Georgia/Tb-82/2020,Georgia/Tb-468/2020,Georgia/Tb-54/2020,Georgia/Tb-477/2020
Rita Feghali et al	7	unknown	unknown	unknown	Lebanon/S5_762/2020,Lebanon/S9_764/2020,Lebanon/S2_759/2020,Lebanon/S8_767/2020,Lebanon/S10_768/2020,Lebanon/S1_758/2020,Lebanon/S4_761/2020
Githinji G. et al 2020 et al	2	Introduction and local transmission of SARS-CoV-2 cases in Kenya	unknown	https://virological.org/t/introduction-and-local-transmission-of-sars-cov-2-cases-in-kenya/497	Kenya/S052/2020,Kenya/S109/2020
Placide Mbala-Kingebeni et al	26	unknown	unknown	unknown	DRC/299/2020,DRC/300/2020,DRC/158/2020,DRC/KN-0059/2020,DRC/108/2020,DRC/191/2020,DRC/236/2020,DRC/KN-0038/2020,DRC/254/2020,DRC/243/2020,DRC/KN-0060/2020,DRC/KN-13/2020,DRC/81/2020,DRC/215/2020,DRC/241/2020,DRC/214/2020,DRC/KN-0054/2020,DRC/KN-0070/2020,DRC/80/2020,DRC/KN-0072/2020,DRC/73/2020,DRC/KN-0058/2020,DRC/94/2020,DRC/248/2020,DRC/82/2020,DRC/253/2020
Kathrine Stene-Johansen et al	31	unknown	unknown	unknown	Norway/1380/2020,Norway/1379/2020,Norway/1538/2020,Norway/1494/2020,Norway/1455/2020,Norway/1443/2020,Norway/1694/2020,Norway/1493/2020,Norway/2052/2020,Norway/2087/2020,Norway/1526/2020,Norway/1811/2020,Norway/1772/2020,Norway/1495/2020,Norway/1953/2020,Norway/1955/2020,Norway/2200/2020,Norway/2088/2020,Norway/1781/2020,Norway/2084/2020,Norway/2113/2020,Norway/2114/2020,Norway/1951/2020,Norway/1…
Jalees A. Nasir et al	1	unknown	unknown	unknown	Canada/ON_SHSC-01/2020
Pramod Kumar et al	10	Integrated genomic view of SARS-CoV-2 in India	unknown	https://dx.doi.org/10.1101/2020.06.04.128751	India/NCDC-01441/2020,India/NCDC-01604/2020,India/NCDC-01638/2020,India/NCDC-01457/2020,India/NCDC-01537/2020,India/NCDC-01712/2020,India/NCDC-01711/2020,India/NCDC-01757/2020,India/NCDC-01744/2020,India/NCDC-01538/2020
Iglesias-Caballero et al A	8	unknown	unknown	unknown	Spain/Andalucia201257/2020,Spain/PaisVasco201385/2020,Spain/Galicia201796/2020,Spain/LaRioja201277/2020,Spain/PaisVasco201388/2020,Spain/Madrid201706/2020,Spain/Melilla202452/2020,Spain/Canarias201939/2020
JianXiong Li et al	4	unknown	unknown	unknown	Nanchang/JX39/2020,Xinyu/JX122/2020,Shangrao/JX1215/2020,Shangrao/JX1178/2020
Xiao-Lin Jiang et al	1	unknown	unknown	unknown	Shandong/LY003-2/2020
Jeong-Min Kim et al A	30	unknown	unknown	unknown	SouthKorea/KCDC24/2020,Korea/KCDC2002/2020,SouthKorea/KCDC07/2020,Korea/KCDC2006/2020,Korea/KCDC2008/2020,Korea/KCDC2009/2020,SouthKorea/KCDC03/2020,SouthKorea/KCDC06/2020,Korea/KCDC2011/2020,Korea/KCDC2018/2020,Korea/KCDC2014/2020,Korea/KCDC2013/2020,Korea/KCDC2012/2020,Korea/KCDC2044/2020,Korea/KCDC2027/2020,Korea/KCDC2045/2020,Korea/KCDC2025/2020,Korea/KCDC2016/2020,Korea/KCDC2015/2020,Korea/K…
Jeong-Min Kim et al B	1	Whole genome and phylogenetic analysis of two SARS-CoV-2 strains isolated in Italy in January and February 2020: additional clues on multiple introductions and further circulation in Europe	unknown	https://dx.doi.org/10.2807/1560-7917.ES.2020.25.13.2000305	SouthKorea/KCDC05/2020
Potdar V et al B	2	Full-genome sequences of the first two SARS-CoV-2 viruses from India	unknown	https://dx.doi.org/10.4103/ijmr.IJMR_663_20	India/1-31/2020,India/1-27/2020
Changmin Kang et al	3	unknown	unknown	unknown	SouthKorea/KUMC01/2020,SouthKorea/KUMC06/2020,SouthKorea/KUMC02/2020
Fan et al	1	unknown	unknown	unknown	Beijing/Wuhan_IME-BJ03/2020
Krista Queen et al A	8	unknown	unknown	unknown	USA/TX1/2020,USA/CA7/2020,Korea/BA-ACH_2719/2020,Jamaica/JM-CDC-0078/2020,USA/TX_2039/2020,USA/CA9/2020,USA/RI_0556/2020,Jamaica/JM-CDC-6729/2020
Chan et al	3	unknown	unknown	unknown	Shenzhen/HKU-SZ-005/2020,Shenzhen/HKU-SZ-002/2020,HongKong/HKU-001a/2020
Tsuyoshi Sekizuka et al A	2	Whole genome and phylogenetic analysis of two SARS-CoV-2 strains isolated in Italy in January and February 2020: additional clues on multiple introductions and further circulation in Europe	unknown	https://dx.doi.org/10.2807/1560-7917.ES.2020.25.13.2000305	Japan/TY-WK-012/2020,Japan/OS-20-07-1/2020
Tsuyoshi Sekizuka et al B	4	unknown	unknown	unknown	Japan/TY-WK-501/2020,Japan/TY-WK-521/2020,Japan/KY-V-029/2020,Japan/AI-I-004/2020
et al	3	unknown	unknown	unknown	Guangzhou/GZMU0050/2020,Guangzhou/GZMU0025/2020,Guangzhou/GZMU0059/2020
Ying Tao et al A	3	First 12 patients with coronavirus disease 2019 (COVID-19) in the United States	unknown	https://dx.doi.org/10.1101/2020.03.09.20032896	USA/AZ1/2020,USA/CA5/2020,USA/IL1/2020
Matt Storey et al B	29	unknown	unknown	unknown	NewZealand/20VR0276/2020,NewZealand/20VR0989/2020,NewZealand/20VR0987/2020,NewZealand/20VR1275/2020,NewZealand/20VR0999/2020,NewZealand/20VR1380/2020,NewZealand/20VR1290/2020,NewZealand/20VR0462/2020,NewZealand/20VR1627/2020,NewZealand/20VR1276/2020,NewZealand/20VR1626/2020,NewZealand/20VR0901/2020,NewZealand/20VR1799/2020,NewZealand/20VR1115/2020,NewZealand/20VR1451/2020,NewZealand/20VR1499/2020…
Anna Uehara et al	2	First 12 patients with coronavirus disease 2019 (COVID-19) in the United States	unknown	https://dx.doi.org/10.1101/2020.03.09.20032896	USA/CA1/2020,USA/CA2/2020
Dominic N.C. Tsang et al	7	unknown	unknown	unknown	HongKong/VM20001061-2/2020,HongKong/VM20002493-2/2020,HongKong/VB20024950-2/2020,HongKong/VM20002507-2/2020,HongKong/VM20002582-2/2020,HongKong/VM20002849/2020,HongKong/VB20026565-2/2020
Le Quynh Mai et al	4	unknown	unknown	unknown	Vietnam/CM99/2020,Vietnam/39607/2020,Vietnam/CM295/2020,Vietnam/CM296/2020
Ung Thi Hong Trang et al	1	unknown	unknown	unknown	Vietnam/VR03-38142/2020
Yan Li et al A	1	First 12 patients with coronavirus disease 2019 (COVID-19) in the United States	unknown	https://dx.doi.org/10.1101/2020.03.09.20032896	USA/IL2/2020
Daryl Domman et al	2	unknown	unknown	unknown	USA/WY-WYPHL-00029/2020,USA/WY-WYPHL-00032/2020
Shiou-Hwei Yeh et al A	8	unknown	unknown	unknown	Taiwan/NTU13/2020,Taiwan/NTU01/2020,Taiwan/NTU03/2020,Taiwan/NTU10/2020,Taiwan/NTU20/2020,Taiwan/NTU14/2020,Taiwan/NTU19/2020,Taiwan/NTU12/2020
Allison McGeer et al	3	unknown	unknown	unknown	Canada/ON_MU-S7/2020,Canada/ON_MU-S63/2020,Canada/ON_MU-S29/2020
Blankenship HM et al	3	unknown	unknown	unknown	USA/MI-MDHHS-SC20058/2020,USA/MI-MDHHS-SC20023/2020,USA/MI-MDHHS-SC20019/2020
Ben Huang et al A	3	unknown	unknown	unknown	Australia/QLD02/2020,Australia/QLD01/2020,Australia/QLD04/2020
Ben Huang et al B	1	Whole genome and phylogenetic analysis of two SARS-CoV-2 strains isolated in Italy in January and February 2020: additional clues on multiple introductions and further circulation in Europe	unknown	https://dx.doi.org/10.2807/1560-7917.ES.2020.25.13.2000305	Australia/QLD03/2020
Dan Lule Bugembe et al	2	unknown	unknown	unknown	Uganda/UG012/2020,Uganda/UG013/2020
Danielle E Anderson et al A	7	Discovery of a 382-nt deletion during the early evolution of SARS-CoV-2	unknown	https://dx.doi.org/doi/10.1101/2020.03.11.987222	Singapore/4/2020,Singapore/5/2020,Singapore/2/2020,Singapore/6/2020,Singapore/13/2020,Singapore/12/2020,Singapore/3/2020
Ana S. Gonzalez-Reiche et al A	1	Introductions and early spread of SARS-CoV-2 in the New York City area	unknown	https://dx.doi.org/10.1101/2020.04.08.20056929	USA/NY-PV08148/2020
Ndongo Dia et al	22	unknown	unknown	unknown	Senegal/620/2020,Senegal/618/2020,Senegal/136/2020,Senegal/306/2020,Senegal/382/2020,Senegal/611/2020,Senegal/370/2020,Senegal/328/2020,Senegal/640/2020,Senegal/026/2020,Senegal/003/2020,Senegal/016/2020,Senegal/020/2020,Senegal/094/2020,Senegal/119/2020,Senegal/082/2020,Senegal/087/2020,Senegal/073/2020,Senegal/102/2020,Senegal/600/2020,Senegal/315/2020,Senegal/139/2020
Fares et al	1	First whole genome sequences and phylogenetic analysis of SARS-CoV-2 virus isolates during COVID-19 outbreak in Tunisia, North Africa.	unknown	https://dx.doi.org/10.22541/au.159137642.26983355	Tunisia/COV0010-12/2020
Sharif Hala et al	10	unknown	unknown	unknown	SaudiArabia/KAUST-Makkah12/2020,SaudiArabia/KAUST-Makkah18/2020,SaudiArabia/KAUST-Makkah05/2020,SaudiArabia/KAUST-Makkah06/2020,SaudiArabia/KAUST-Makkah13/2020,SaudiArabia/KAUST-Makkah03/2020,SaudiArabia/KAUST-Makkah04/2020,SaudiArabia/KAUST-Makkah09/2020,SaudiArabia/KAUST-Makkah20/2020,SaudiArabia/KAUST-Makkah10/2020
Azhar et al	11	unknown	unknown	unknown	SaudiArabia/85613/2020,SaudiArabia/832279/2020,SaudiArabia/85715/2020,SaudiArabia/86650/2020,SaudiArabia/4637/2020,SaudiArabia/86267/2020,SaudiArabia/42952/2020,SaudiArabia/85791C/2020,SaudiArabia/85790/2020,SaudiArabia/85791/2020,SaudiArabia/86327/2020
Mohd Noor Mat Isa et al	10	unknown	unknown	unknown	Malaysia/IMR_WC119/2020,Malaysia/MKAK-CL-2020-5096/2020,Malaysia/MKAK-CL-2020-6430/2020,Malaysia/MKAK-CL-2020-5045/2020,Malaysia/MKAK-CL-2020-5049/2020,Malaysia/MKAK-CL-2020-5047/2020,Malaysia/IMR_WC1114/2020,Malaysia/MKAK-CL-2020-7554/2020,Malaysia/IMR_WC413/2020,Malaysia/IMR_WC458/2020
Jude Jayamaha et al	2	unknown	unknown	unknown	SriLanka/3865/2020,SriLanka/3888/2020
Elizabeth Batty et al B	3	Genomic surveillance of SARS-CoV-2 in Thailand reveals mixed imported populations, a local lineage expansion and a virus with truncated ORF7a	unknown	https://dx.doi.org/10.1101/2020.05.22.20108498	Thailand/Bangkok-0034/2020,Thailand/Bangkok-0025/2020,Thailand/Bangkok-0036/2020
Griselda De Marco et al	1	Phylodynamics of SARS-CoV-2 transmission in Spain	unknown	https://dx.doi.org/10.1101/2020.04.20.050039	Spain/Valencia6/2020
M̩lnie Albert et al A	1	unknown	unknown	unknown	France/GE1583/2020
Anke Wienecke-Baldacchino et al	31	unknown	unknown	unknown	Luxembourg/LNS3307371/2020,Luxembourg/LNS0945359/2020,Luxembourg/LNS0000001/2020,Luxembourg/LNS7580831/2020,Luxembourg/LNS1586597/2020,Luxembourg/LNS2458673/2020,Luxembourg/LNS4836560/2020,Luxembourg/LNS6783622/2020,Luxembourg/LNS0814536/2020,Luxembourg/LNS1055944/2020,Luxembourg/LNS8746229/2020,Luxembourg/LNS9598665/2020,Luxembourg/LNS4830703/2020,Luxembourg/LNS2013896/2020,Luxembourg/LNS7970956…
Valdinete Nascimento et al	1	COVID-19 in Latin America: Contrasting phylodynamic inference with epidemiological surveillance.	unknown	https://dx.doi.org/10.1101/2020.05.23.20111443	Brazil/AMBR-02/2020
Carla L<cc>_pez-Causap̩ et al	3	unknown	unknown	unknown	Spain/COV002493/2020,Spain/Palma2528/2020,Spain/Palma2537/2020
Silvia Hern<cc><c1>ez Crespo et al	6	unknown	unknown	unknown	Spain/COV001438/2020,Spain/COV001534/2020,Spain/COV000860/2020,Spain/COV000692/2020,Spain/COV001612/2020,Spain/COV001512/2020
Inmaculada de Toro Peinado et al	4	unknown	unknown	unknown	Spain/COV001940/2020,Spain/COV001993/2020,Spain/COV001939/2020,Spain/COV001970/2020
Maria Alma Bracho et al	1	unknown	unknown	unknown	Spain/Valencia4/2020
Dorota Kujawa et al	1	unknown	unknown	unknown	Poland/Wro-02/2020
Neris Garcia-Gonzalez et al	2	unknown	unknown	unknown	Spain/Valencia266/2020,Spain/Valencia25/2020
Maria Dolores Ocete et al A	1	Phylodynamics of SARS-CoV-2 transmission in Spain	unknown	https://dx.doi.org/10.1101/2020.04.20.050039	Spain/Valencia5/2020
Marine Murtskhvaladze et al	3	unknown	unknown	unknown	Georgia/Tb-390/2020,Georgia/Tb-673/2020,Georgia/Tb-273/2020
Giuseppe D'Auria et al	1	unknown	unknown	unknown	Spain/Valencia23/2020
Andr̩s E Castillo et al	27	unknown	unknown	unknown	Chile/Santiago_3/2020,Chile/Santiago_27/2020,Chile/Santiago_62/2020,Chile/Santiago_60/2020,Chile/Coyhaique_1/2020,Chile/Santiago_59/2020,Chile/Santiago_34/2020,Chile/Santiago_20/2020,Chile/Santiago_70/2020,Chile/Santiago_41/2020,Chile/Santiago_68/2020,Chile/Santiago_61/2020,Chile/Santiago_72/2020,Chile/Santiago_49/2020,Chile/Punta_Arenas_16/2020,Chile/Temuco_2/2020,Chile/Valparaiso_2/2020,Chile/P…
Bas Oude Munnink et al	21	unknown	unknown	unknown	Netherlands/NA_673/2020,Netherlands/NA_73/2020,Netherlands/NA_112/2020,Netherlands/NA_67/2020,Netherlands/NoordBrabant_114/2020,Netherlands/NoordBrabant_82/2020,Netherlands/ZuidHolland_48/2020,Netherlands/Zeeland_8/2020,Netherlands/NA_82/2020,Netherlands/NA_182/2020,Netherlands/NA_175/2020,Netherlands/ZuidHolland_37/2020,Netherlands/NoordBrabant_117/2020,Netherlands/NA_177/2020,Netherlands/NA_126…
Borges et al et al	18	unknown	unknown	unknown	Portugal/PT0501/2020,Portugal/PT0130/2020,Portugal/PT0285/2020,Portugal/PT0305/2020,Portugal/PT0373/2020,Portugal/PT0410/2020,Portugal/PT0440/2020,Portugal/PT0382/2020,Portugal/PT0318/2020,Portugal/PT0340/2020,Portugal/PT0386/2020,Portugal/PT0358/2020,Portugal/PT0343/2020,Portugal/PT0377/2020,Portugal/PT0105/2020,Portugal/PT0300/2020,Portugal/PT0387/2020,Portugal/PT0292/2020
Guillermo M. Ruiz-Palacios et al	4	Genomic analysis of early SARS-CoV-2 strains introduced in Mexico	unknown	https://dx.doi.org/10.1101/2020.05.27.120402	Mexico/CDMX-INCMNSZ_02/2020,Mexico/CDMX-INCMNSZ_04/2020,Mexico/CDMX-INCMNSZ_01/2020,Mexico/CDMX-INCMNSZ_05/2020
Nguyen Van Vinh Chau et al	2	unknown	unknown	unknown	Vietnam/HCMC-35016/2020,Vietnam/HCMC-35005/2020
David Navarro et al	1	unknown	unknown	unknown	Spain/Valencia203/2020
Lex Leong et al	6	unknown	unknown	unknown	Australia/SAP037/2020,Australia/SAP097/2020,Australia/SAP305/2020,Australia/SAP214/2020,Australia/SAP127/2020,Australia/SAP220/2020
Maria Bampali et al	1	unknown	unknown	unknown	Greece/16/2020
Maria Victoria Elizondo et al	11	unknown	unknown	unknown	Uruguay/UY-NYUMC850/2020,Uruguay/UY-NYUMC852/2020,Uruguay/UY-NYUMC844/2020,Uruguay/UY-NYUMC845/2020,Uruguay/UY-NYUMC846/2020,Uruguay/UY-NYUMC847/2020,Uruguay/UY-NYUMC855/2020,Uruguay/UY-NYUMC856/2020,Uruguay/UY-NYUMC848/2020,Uruguay/UY-NYUMC857/2020,Uruguay/UY-NYUMC858/2020
Filipe Romero et al	3	unknown	unknown	unknown	Brazil/RJ0113/2020,Brazil/MG0112/2020,Brazil/RJ0116/2020
Ji-Rong Yang et al A	9	unknown	unknown	unknown	Taiwan/3/2020,Taiwan/5/2020,Taiwan/8/2020,Taiwan/107/2020,Taiwan/225/2020,Taiwan/78/2020,Taiwan/58/2020,Taiwan/144/2020,Taiwan/128/2020
Jinkun Chen et al	2	unknown	unknown	unknown	Shaoxing/01/2020,Shaoxing/08/2020
Bert Vanmechelen et al	7	A phylodynamic workflow to rapidly gain insights into the dispersal history and dynamics of SARS-CoV-2 lineages	unknown	https://dx.doi.org/10.1101/2020.05.05.078758	Belgium/GHB-03021/2020,Belgium/VPE-030650/2020,Belgium/CG-030158/2020,Belgium/DB-03023/2020,Belgium/RS-030257/2020,Belgium/VS-030542/2020,Belgium/JRH-030459/2020
Gaete A et al	2	unknown	unknown	unknown	Chile/Talca-25343/2020,Chile/VinaDelMar-28875/2020
Lidia Ruiz Roldan et al	1	unknown	unknown	unknown	Spain/Valencia92/2020
Juan Alberola Engu<cc>_danos et al	2	unknown	unknown	unknown	Spain/Valencia161/2020,Spain/Valencia162/2020
Loreto Ferr̼s Abad et al	2	unknown	unknown	unknown	Spain/Valencia107/2020,Spain/Valencia46/2020
Alexandra Popa et al	36	unknown	unknown	unknown	Austria/CeMM0212/2020,Austria/CeMM0114/2020,Austria/CeMM0002/2020,Austria/CeMM0216/2020,Austria/CeMM0243/2020,Austria/CeMM0006/2020,Austria/CeMM0025/2020,Austria/CeMM0030/2020,Austria/CeMM0036/2020,Austria/CeMM0125/2020,Austria/CeMM0104/2020,Austria/CeMM0037/2020,Austria/CeMM0121/2020,Austria/CeMM0013/2020,Austria/CeMM0193/2020,Austria/CeMM0194/2020,Austria/CeMM0247/2020,Austria/CeMM0137/2020,Aus…
Gisela Barrera Badillo et al	1	Genomic analysis of early SARS-CoV-2 strains introduced in Mexico	unknown	https://dx.doi.org/10.1101/2020.05.27.120402	Mexico/Queretaro-InDRE_04/2020
Rodriguez-Maldonado Abril et al	2	unknown	unknown	unknown	Mexico/CDMX-InDRE_18/2020,Mexico/CDMX-InDRE_17/2020
Antonio Rezusta L<cc>_pez et al	3	unknown	unknown	unknown	Spain/Zaragoza2415/2020,Spain/Zaragoza2416/2020,Spain/Zaragoza2467/2020
Andr̩s E. Castillo et al	1	Phylogenetic analysis of the first four SARS-CoV-2 cases in Chile	unknown	https://dx.doi.org/10.1002/jmv.25797	Chile/Talca-2/2020
Katherine Laiton-Donato et al A	28	Substitutions in Spike and Nucleocapsid proteins of SARS-CoV-2 circulating in Colombia	unknown	https://dx.doi.org/10.1101/2020.06.02.20120782	Colombia/INS-79253/2020,Colombia/INS-80825/2020,Colombia/INS-79911/2020,Colombia/INS-80663/2020,Colombia/INS-79965/2020,Colombia/INS-79930/2020,Colombia/INS-79943/2020,Colombia/INS-80245/2020,Colombia/INS-79190/2020,Colombia/INS-80656/2020,Colombia/INS-79743/2020,Colombia/INS-79773/2020,Colombia/INS-79779/2020,Colombia/INS-80202/2020,Colombia/INS-82457/2020,Colombia/INS-84861/2020,Colombia/INS-79…
Irma L<cc>_pez Mart<cc>_nez et al	1	Genomic analysis of early SARS-CoV-2 strains introduced in Mexico	unknown	https://dx.doi.org/10.1101/2020.05.27.120402	Mexico/EdoMex-InDRE_03/2020
Panzera et al	1	unknown	unknown	unknown	Uruguay/Mdeo-1/2020
Cecilia Salazar et al	5	Multiple introductions, regional spread and local differentiation during the first week of COVID-19 epidemic in Montevideo, Uruguay	unknown	https://dx.doi.org/10.1101/2020.05.09.086223	Uruguay/UY-5/2020,Uruguay/UY-6/2020,Uruguay/UY-9/2020,Uruguay/UY-7/2020,Uruguay/UY-10/2020
Queen et al	1	Isolation and characterization of SARS-CoV-2 from the first US COVID-19 patient	unknown	https://dx.doi.org/10.1101/2020.03.02.972935	USA/WA1/2020
Ramon Lorenzo-Redondo et al	1	A Unique Clade of SARS-CoV-2 Viruses is Associated with Lower Viral Loads in Patient Upper Airways	unknown	https://dx.doi.org/10.1101/2020.05.19.20107144	USA/IL-NM055/2020
Chu etl al et al	12	Cryptic transmission of SARS-CoV-2 in Washington State	unknown	https://doi.dx.org/10.1101/2020.04.02.20051417	USA/WA-S113/2020,USA/WA-S89/2020,USA/WA-S94/2020,USA/WA-S106/2020,USA/WA-S107/2020,USA/WA-S47/2020,USA/WA-S82/2020,USA/WA-S98/2020,USA/WA-S55/2020,USA/WA-S115/2020,USA/WA-S43/2020,USA/WA-S122/2020
Pavitra Roychoudhury et al A	5	Cryptic transmission of SARS-CoV-2 in Washington State	unknown	https://doi.dx.org/10.1101/2020.04.02.20051417	USA/WA-UW228/2020,USA/WA4-UW2/2020,USA/WA6-UW3/2020,USA/WA-UW71/2020,USA/WA3-UW1/2020
Chisha Sikazwe et al	4	unknown	unknown	unknown	Australia/WA04/2020,Australia/WA07/2020,Australia/WA34/2020,Australia/WA11/2020
Pavitra Roychoudhury et al B	4	unknown	unknown	unknown	USA/WA-UW-1919/2020,USA/WA-UW-1347/2020,USA/IL-UW353/2020,USA/WA-UW-1888/2020
Taboada Ram<cc>_rez Blanca. Ramirez-Gonzalez Ernesto et al	2	unknown	unknown	unknown	Mexico/CDMX-InDRE_09/2020,Mexico/CDMX-InDRE_10/2020
Xianding Deng et al B	2	Genomic surveillance reveals multiple introductions of SARS-CoV-2 into Northern California	unknown	https://dx.doi.org/10.1126/science.abb9263	USA/CA-CDPH-UC9/2020,USA/CA-SCCPHD-UC14/2020
Chu et al et al A	2	unknown	unknown	unknown	USA/WA-S257/2020,USA/WA-S254/2020
Chu et al et al B	2	Cryptic transmission of SARS-CoV-2 in Washington State	unknown	https://doi.dx.org/10.1101/2020.04.02.20051417	USA/WA-S8/2020,USA/WA-S7/2020
Anna Majer et al	5	unknown	unknown	unknown	Canada/MB_8/2020,Canada/NL_34/2020,Canada/MB_38/2020,Canada/NL_82/2020,Canada/NL_97/2020
CZB Cliahub Consortium et al	2	unknown	unknown	unknown	USA/CA-CZB-1575/2020,USA/CA-CZB-1579/2020
Duarte et al	5	unknown	unknown	unknown	CostaRica/03/2020,CostaRica/01/2020,CostaRica/02/2020,CostaRica/04/2020,CostaRica/05/2020
Daniel F Gudbjartsson et al	31	Spread of SARS-CoV-2 in the Icelandic Population	unknown	https://dx.doi.org/10.1056/NEJMoa2006100	Iceland/190/2020,Iceland/140/2020,Iceland/13/2020,Iceland/225/2020,Iceland/119/2020,Iceland/498/2020,Iceland/131/2020,Iceland/338/2020,Iceland/7/2020,Iceland/353/2020,Iceland/198/2020,Iceland/235/2020,Iceland/176/2020,Iceland/193/2020,Iceland/112/2020,Iceland/309/2020,Iceland/428/2020,Iceland/18/2020,Iceland/319/2020,Iceland/478/2020,Iceland/96/2020,Iceland/66/2020,Iceland/25/2020,Iceland/291/202…
Adnan Araiza Rodr<cc>_guez et al	1	Genomic analysis of early SARS-CoV-2 strains introduced in Mexico	unknown	https://dx.doi.org/10.1101/2020.05.27.120402	Mexico/CDMX-InDRE_06/2020
Joel Armando V<cc><c1>zquez P̩rez et al	4	Genomic analysis of early SARS-CoV-2 strains introduced in Mexico	unknown	https://dx.doi.org/10.1101/2020.05.27.120402	Mexico/CDMX-INER_05/2020,Mexico/CDMX-INER_04/2020,Mexico/CDMX-INER_02/2020,Mexico/CDMX-INER_01/2020
Mendieta-Condado Edgar et al	2	unknown	unknown	unknown	Mexico/CDMX-InDRE_15/2020,Mexico/CDMX-InDRE_16/2020
Anderson et al	2	unknown	unknown	unknown	USA/PA-QDX-30/2020,USA/NY-QDX-95/2020
Caly et al A	1	unknown	unknown	unknown	Australia/VIC1358/2020
Tuna Toptan1 et al	2	unknown	unknown	unknown	Germany/FrankfurtFFM1/2020,Germany/FrankfurtFFM7/2020
Clinton R. Paden et al	1	First 12 patients with coronavirus disease 2019 (COVID-19) in the United States	unknown	https://dx.doi.org/10.1101/2020.03.09.20032896	USA/MA1/2020
Min Kang et al A	1	Whole genome and phylogenetic analysis of two SARS-CoV-2 strains isolated in Italy in January and February 2020: additional clues on multiple introductions and further circulation in Europe	unknown	https://dx.doi.org/10.2807/1560-7917.ES.2020.25.13.2000305	Foshan/20SF207/2020
Shari Tyson et al	1	unknown	unknown	unknown	Canada/ON_VIDO-01/2020
Krista Queen et al B	1	First 12 patients with coronavirus disease 2019 (COVID-19) in the United States	unknown	https://dx.doi.org/10.1101/2020.03.09.20032896	USA/CA4/2020
Amrit S. Boese et al	1	unknown	unknown	unknown	Canada/ON_ON-VIDO-01-2/2020
FOI Bioinformatics team et al	2	unknown	unknown	unknown	Sweden/RV-FOI-1/2020,Sweden/RV-FOI-6/2020
Zhang et al	1	A new coronavirus associated with human respiratory disease in China	unknown	https://dx.doi.org/10.1038/s41586-020-2008-3	Wuhan/Hu-1/2019
Min Kang et al B	2	unknown	unknown	unknown	Guangzhou/20SF206/2020,Guangdong/20SF040/2020
Muttineni Radhakrishna et al	1	Phylogenetic clustering of the Indian SARS-CoV-2 genomes reveals the presence of distinct clades of viral haplotypes among states	unknown	https://www.biorxiv.org/content/10.1101/2020.05.28.122143v1	India/GMC-RK100/2020
Neta Zuckerman et al	2	unknown	unknown	unknown	Israel/CVL-n3166/2020,Israel/CVL-n3120/2020
Carlo M. Lapid et al	1	unknown	unknown	unknown	Philippines/PGC01/2020
Stern Lab et al	26	Full genome viral sequences inform patterns of SARS-CoV-2 spread into and within Israel	unknown	https://dx.doi.org/10.1101/2020.05.21.20104521	Israel/2020069/2020,Israel/701002407/2020,Israel/51137844/2020,Israel/51141225/2020,Israel/51140315/2020,Israel/51140836/2020,Israel/51140028/2020,Israel/51141121/2020,Israel/2020078/2020,Israel/51140068/2020,Israel/2020051/2020,Israel/701002334/2020,Israel/2020063/2020,Israel/701002327/2020,Israel/2020038/2020,Israel/2020084/2020,Israel/2023922/2020,Israel/701002313/2020,Israel/2020068/2020,Isra…
Medado et al	2	unknown	unknown	unknown	Philippines/RITM-03/2020,Philippines/RITM-07/2020
Majed Alghoribi et al	1	unknown	unknown	unknown	SaudiArabia/KAIMRC-Alghoribi/2020
Yan Li et al B	4	unknown	unknown	unknown	Jamaica/JM-CDC-4376/2020,Jamaica/JM-CDC-6365/2020,Jamaica/JM-CDC-7286/2020,Jamaica/JM-CDC-6603/2020
Suppiah J et al	3	unknown	unknown	unknown	Malaysia/IMR_WC2423/2020,Malaysia/IMR_WC2453/2020,Malaysia/IMR_WC2665/2020
Yoong Min CHONG et al	2	Complete Genome Sequences of SARS-CoV-2 Strains Detected in Malaysia	unknown	https://dx.doi.org/10.1128/MRA.00383-20	Malaysia/188407/2020,Malaysia/189332/2020
Mak Tze Minn et al	20	unknown	unknown	unknown	Singapore/135/2020,Singapore/156/2020,Brunei/4/2020,Brunei/5/2020,Brunei/3/2020,Brunei/1/2020,Brunei/2/2020,Singapore/108/2020,Singapore/114/2020,Singapore/150/2020,Singapore/119/2020,Singapore/134/2020,Singapore/104/2020,Singapore/123/2020,Singapore/95/2020,Singapore/137/2020,Singapore/94/2020,Singapore/118/2020,Singapore/97/2020,Singapore/122/2020
Sesay et al et al A	2	Origin of imported SARS-CoV-2 strains in The Gambia identified from Whole Genome Sequences	unknown	https://dx.doi.org/10.1101/2020.04.30.070771	Gambia/GC19-026/2020,Gambia/GC19-015/2020
Logan Voegtly et al	1	unknown	unknown	unknown	Guam/GU_NHG_03/2020
Ranjit Sah et al	1	Insights into The Codon Usage Bias of 13 Severe Acute Respiratory Syndrome Coronavirus 2 (SARS-CoV-2) Isolates from Different Geo-locations	unknown	http://biorxiv.org/lookup/doi/10.1101/2020.04.01.019463	Nepal/61/2020
Shakeel et al	1	unknown	unknown	unknown	Pakistan/KHI1/2020
Kenneth Siu-Sing LEUNG et al	28	A territory-wide study of early COVID-19 outbreak in Hong Kong community: A clinical, epidemiological and phylogenomic investigation	unknown	https://dx.doi.org/10.1101/2020.03.30.20045740	HongKong/HKPU2_1801/2020,HongKong/HKPU48-0202/2020,HongKong/HKPU86-1802/2020,HongKong/HKPU19_0402/2020,HongKong/HKPU102_2802/2020,HongKong/HKPU76-0802/2020,HongKong/HKPU36-0702/2020,HongKong/HKPU90-1602/2020,HongKong/HKPU45-0502/2020,HongKong/HKPU74-1302/2020,HongKong/HKPU84-2502/2020,HongKong/HKPU91-2002/2020,HongKong/HKPU89-2502/2020,HongKong/HKPU64-1202/2020,HongKong/HKPU41-0802/2020,HongKong/…
Alan K.L. Tsang et al	1	unknown	unknown	unknown	HongKong/VB20017970-2/2020
Caly et al B	1	Isolation and rapid sharing of the 2019 novel coronavirus (SARS-CoV-2) from the first patient diagnosed with COVID-19 in Australia	unknown	https://dx.doi.org/10.5694/mja2.50569	Australia/VIC01/2020
Ji-Rong Yang et al B	1	Prolonged viral shedding and new mutations of COVID-19 could complicate the control of the pandemic	unknown	https://dx.doi.org/10.1099/acmi.0.000133	Taiwan/2/2020
Martina Rueca et al	4	unknown	unknown	unknown	Italy/INMI1-B2/2020,Italy/CR-9214-26Feb/2020,Italy/BG-9225-26Feb/2020,Italy/INMI5-N/2020
Bengner et al	1	Whole genome and phylogenetic analysis of two SARS-CoV-2 strains isolated in Italy in January and February 2020: additional clues on multiple introductions and further circulation in Europe	unknown	https://dx.doi.org/10.2807/1560-7917.ES.2020.25.13.2000305	Sweden/01/2020
M̩lanie Albert et al A	13	Introductions and early spread of SARS-CoV-2 in France	unknown	https://dx.doi.org/10.1101/2020.04.24.059576	France/IDF0373/2020,France/IDF0372/2020,France/IDF0515/2020,France/B1623/2020,France/HF1463/2020,France/HF3141/2020,France/HF3036/2020,France/HF2595/2020,France/IDF2936/2020,France/HF1645/2020,France/IDF2561/2020,France/IDF2534/2020,France/BFC2709/2020
Olivier Terrier et al	1	Whole genome and phylogenetic analysis of two SARS-CoV-2 strains isolated in Italy in January and February 2020: additional clues on multiple introductions and further circulation in Europe	unknown	https://dx.doi.org/10.2807/1560-7917.ES.2020.25.13.2000305	France/IDF0386-islP1/2020
Zigui Chen et al	1	unknown	unknown	unknown	HongKong/CUHK1/2020
Sit et al	1	unknown	unknown	unknown	HongKong/VM2003179/2020
Chong-Yee YAU et al	1	A territory-wide study of early COVID-19 outbreak in Hong Kong community: A clinical, epidemiological and phylogenomic investigation	unknown	https://dx.doi.org/10.1101/2020.03.30.20045740	HongKong/HKPU35_0402/2020
Ying Tao et al B	1	unknown	unknown	unknown	USA/WA_5030/2020
Toma<81>_ Mark Zorec et al	1	unknown	unknown	unknown	Slovenia/808/2020
Iglesias-Caballero et al B	3	Phylodynamics of SARS-CoV-2 transmission in Spain	unknown	https://dx.doi.org/10.1101/2020.04.20.050039	Spain/Andalucia201272/2020,Spain/CastillayLeon201061/2020,Spain/Madrid201105/2020
Teemu Smura et al A	31	unknown	unknown	unknown	Finland/FIN01032020/2020,Finland/FIN03032020B/2020,Finland/14M20/2020,Finland/13M79/2020,Finland/14M82/2020,Finland/1/2020,Finland/FIN-114/2020,Finland/13M19/2020,Finland/14M13/2020,Finland/14M14/2020,Finland/FIN-266/2020,Finland/13M57/2020,Finland/14M77/2020,Finland/13M33/2020,Finland/13M82/2020,Finland/14M26/2020,Finland/14M12/2020,Finland/13M58/2020,Finland/13M65/2020,Finland/13M64/2020,Finlan…
Nguyen Thi Tam et al	23	unknown	unknown	unknown	Vietnam/VNHN_01097/2020,Vietnam/VNHN_0985/2020,Vietnam/VNHN_1167/2020,Vietnam/VNHN_0764/2020,Vietnam/VNHN_1072/2020,Vietnam/VNHN_979/2020,Vietnam/VNHN_1528/2020,Vietnam/VNHN_148/2020,Vietnam/VNHN_302/2020,Vietnam/VNHN_0837/2020,Vietnam/VNHN_0762/2020,Vietnam/VNHN_026/2020,Vietnam/VNHN_022/2020,Vietnam/VNHN_0299/2020,Vietnam/VNHN_301/2020,Vietnam/VNHN_0418/2020,Vietnam/VNHN_1098/2020,Vietnam/VNHN_…
Issa Abu-Dayyeh et al	10	unknown	unknown	unknown	Jordan/SR-056/2020,Jordan/SR-084/2020,Jordan/SR-053/2020,Jordan/SR-032/2020,Jordan/SR-036/2020,Jordan/SR-048/2020,Jordan/SR-043/2020,Jordan/SR-049/2020,Jordan/SR-046/2020,Jordan/SR-033/2020
Luke W Meredith et al A	5	Preliminary analysis of SARS-CoV-2 importation & establishment of UK transmission lineages	unknown	https://virological.org/t/preliminary-analysis-of-sars-cov-2-importation-establishment-of-uk-transmission-lineages/507	England/CAMB-84778/2020,England/CAMB-7525B/2020,England/CAMB-84769/2020,England/CAMB-72D4E/2020,England/CAMB-75051/2020
Max Muenchhoff et al	16	unknown	unknown	unknown	Germany/BAV-MVP0001/2020,Germany/BAV-MVP0110/2020,Germany/BAV-MVP0124/2020,Germany/BAV-MVP0038/2020,Germany/BAV-MVP0054/2020,Germany/BAV-MVP0009/2020,Germany/BAV-V2010492/2020,Germany/BAV-MVP0048/2020,Germany/BAV-MVP0052/2020,Germany/BAV-MVP0045/2020,Germany/BAV-MVP0047/2020,Germany/BAV-MVP0063/2020,Germany/BAV-V2012612/2020,Germany/BAV-MVP0037/2020,Germany/BAV-MVP0036/2020,Germany/BAV-MVP0062/20…
David Nieuwenhuijse et al A	17	Rapid SARS-CoV-2 whole genome sequencing for informed public health decision making in the Netherlands	unknown	https://dx.doi.org/10.1101/2020.04.21.050633	Netherlands/NA_21/2020,Netherlands/ZuidHolland_8/2020,Netherlands/NoordBrabant_47/2020,Netherlands/Limburg_4/2020,Netherlands/NoordBrabant_30/2020,Netherlands/Tilburg_1363354/2020,Netherlands/Oss_1363500/2020,Netherlands/Nieuwendijk_1363582/2020,Netherlands/Overijssel_2-2/2020,Netherlands/Loon_op_zand_1363512/2020,Netherlands/NoordBrabant_68/2020,Netherlands/Houten_1363498/2020,Netherlands/Delft_…
Paola Resende et al A	5	COVID-19 in Latin America: Contrasting phylodynamic inference with epidemiological surveillance.	unknown	https://dx.doi.org/10.1101/2020.05.23.20111443	Brazil/ES-225/2020,Brazil/SC-769/2020,Brazil/AL-837/2020,Brazil/RJ-477i/2020,Brazil/RJ-314/2020
Kassela K. et al	25	Dominant and rare SARS-Cov2 variants responsible for the COVID-19 pandemic in Athens, Greece.	unknown	https://dx.doi.org/10.1101/2020.06.03.20121236	Greece/146/2020,Greece/150/2020,Greece/149/2020,Greece/213_34051/2020,Greece/204_33112/2020,Greece/243_32202/2020,Greece/42_36236/2020,Greece/220_35357/2020,Greece/246_32206/2020,Greece/133/2020,Greece/234_31670/2020,Greece/225_35203/2020,Greece/212_34023/2020,Greece/152_33705/2020,Greece/140/2020,Greece/141/2020,Greece/208_33922/2020,Greece/154/2020,Greece/209_33926/2020,Greece/223_34904/2020,Gr…
Holmes EC et al	1	Revealing COVID-19 Transmission by SARS-CoV-2 Genome Sequencing and Agent Based Modelling	unknown	https://dx.doi.org/10.1101/2020.04.19.048751	Australia/NSW58/2020
Octavia S et al	5	unknown	unknown	unknown	Singapore/8/2020,Singapore/10/2020,Singapore/9/2020,Singapore/7/2020,Singapore/11/2020
Cesare E.M. Gruber et al A	4	unknown	unknown	unknown	Italy/INMI1-B1/2020,Italy/INMI1-N/2020,Italy/INMI11-B/2020,Italy/PV-11951-28Feb/2020
M̩lnie Albert et al B	11	Introductions and early spread of SARS-CoV-2 in France	unknown	https://dx.doi.org/10.1101/2020.04.24.059576	France/B2334/2020,France/N1620/2020,France/GE1977/2020,France/HF1684/2020,France/HF2234/2020,France/B2330/2020,France/PL1643/2020,France/IDF2075/2020,France/IDF2256/2020,France/BFC2147/2020,France/HF2151/2020
Cesare E.M. Gruber et al B	1	The first two cases of 2019-nCoV in Italy: Where they come from?	unknown	https://dx.doi.org/10.1002/jmv.25699	Italy/INMI2-N/2020
Paola Stefanelli et al A	2	Whole genome and phylogenetic analysis of two SARS-CoV-2 strains isolated in Italy in January and February 2020: additional clues on multiple introductions and further circulation in Europe	unknown	https://dx.doi.org/10.2807/1560-7917.ES.2020.25.13.2000305	Italy/SPL1/2020,Italy/CDG1/2020
Maria R. Capobianchi et al A	1	The first two cases of 2019-nCoV in Italy: Where they come from?	unknown	https://dx.doi.org/10.1002/jmv.25699	Italy/INMI1-cs/2020
Ann Machablishvili et al	1	unknown	unknown	unknown	Georgia/Tb-537/2020
Giandhari J et al A	1	Early transmission of SARS-CoV-2 in South Africa: An epidemiological and phylogenetic report	unknown	https://dx.doi.org/10.1101/2020.05.29.20116376	SouthAfrica/KRISP-02/2020
Ramzi Fattouh et al	2	unknown	unknown	unknown	Canada/ON-UHTC_0003/2020,Canada/ON-UHTC_0002/2020
Joan Marti-Carreras et al	8	A phylodynamic workflow to rapidly gain insights into the dispersal history and dynamics of SARS-CoV-2 lineages	unknown	https://dx.doi.org/10.1101/2020.05.05.078758	Belgium/JLJ-0320101/2020,Belgium/SR-0319112/2020,Belgium/TG-030757/2020,Belgium/VGA-030672/2020,Belgium/BJ-030767/2020,Belgium/DD-030593/2020,Belgium/WWM-030665/2020,Belgium/NA-0323141/2020
Stefan Schmutz et al A	1	unknown	unknown	unknown	Switzerland/1000477102/2020
Timms V et al	2	Revealing COVID-19 Transmission by SARS-CoV-2 Genome Sequencing and Agent Based Modelling	unknown	https://dx.doi.org/10.1101/2020.04.19.048751	Australia/NSW86/2020,Australia/NSW219/2020
Keith Durkin et al A	2	unknown	unknown	unknown	Belgium/ULG-0183/2020,Belgium/ULG-0182/2020
Durkin Keith et al	2	A phylodynamic workflow to rapidly gain insights into the dispersal history and dynamics of SARS-CoV-2 lineages	unknown	https://dx.doi.org/10.1101/2020.05.05.078758	Belgium/ULG-3683/2020,Belgium/ULG-6503/2020
Jaqueline Goes de Jesus et al	2	First cases of coronavirus disease (COVID-19) in Brazil, South America	unknown	https://virological.org/t/first-cases-of-coronavirus-disease-covid-19-in-brazil-south-america-2-genomes-3rd-march-2020/409	Brazil/SPBR-02/2020,Brazil/SPBR-01/2020
Nick Vereecke et al	2	unknown	unknown	unknown	Belgium/UGent-89/2020,Belgium/UGent-96/2020
Luke W Meredith et al B	1	Rapid implementation of real-time SARS-CoV-2 sequencing to investigate healthcare-associated COVID-19 infections	unknown	https://dx.doi.org/10.1101/2020.05.08.20095687	England/CAMB-749A2/2020
Victor M Corman et al A	13	unknown	unknown	unknown	BosniaandHerzegovina/ChVir7340/2020,BosniaandHerzegovina/ChVir7357/2020,CzechRepublic/ChVir1912/2020,CzechRepublic/ChVir1630/2020,BosniaandHerzegovina/ChVir7353/2020,BosniaandHerzegovina/ChVir7349/2020,BosniaandHerzegovina/ChVir7348/2020,BosniaandHerzegovina/ChVir7350/2020,BosniaandHerzegovina/ChVir7344/2020,BosniaandHerzegovina/ChVir7347/2020,BosniaandHerzegovina/ChVir7354/2020,BosniaandHerzegov…
Ortwin Adams et al 1 Genetic structure of SARS-CoV-2 in Western Germany reflects clonal superspreading and multiple independent introduction events unknown https://dx.doi.org/10.1101/2020.04.25.20079517 Germany/NRW-54/2020 Jing Zhang et al 2 First 12 patients with coronavirus disease 2019 (COVID-19) in the United States unknown https://dx.doi.org/10.1101/2020.03.09.20032896 USA/WI1/2020,USA/CA6/2…	1	unknown	unknown	unknown	Taiwan/TSGH-15/2020
Ll̼cia Mart<cc>_nez-Priego et al	1	unknown	unknown	unknown	Spain/Valencia42/2020
Kerstin Persson Moberg et al	1	unknown	unknown	unknown	Sweden/20-06071/2020
Andrey Komissarov et al	3	unknown	unknown	unknown	Russia/StPetersburg-RII4144S/2020,Russia/StPetersburg-3524/2020,Russia/StPetersburg-RII3997/2020
Francesco Messina et al	1	unknown	unknown	unknown	Italy/INMI5/2020
Mirian Fern<cc><c1>ndez-Alonso et al	1	unknown	unknown	unknown	Spain/COV001371/2020
Danilo Franco et al	1	unknown	unknown	unknown	Panama/328677/2020
Maria Dolores Ocete et al B	1	unknown	unknown	unknown	Spain/Valencia100/2020
Salud Rodr<cc>_guez-Pallares et al	3	unknown	unknown	unknown	Spain/COV001910/2020,Spain/COV001874/2020,Spain/COV001875/2020
Guillermo Mart<cc>_<e5>_n Guti̩rrez et al	1	unknown	unknown	unknown	Spain/COV001323/2020
Gvantsa Chanturia et al	1	unknown	unknown	unknown	Georgia/Tb-712/2020
Antonin Bal et al	12	unknown	unknown	unknown	France/ARA10876/2020,France/ARA12759/2020,France/ARA10552/2020,France/Lyon_0668/2020,France/ARA1284/2020,France/ARA12877/2020,France/ARA11939/2020,France/ARA11952/2020,France/ARA12249/2020,France/ARA12264/2020,France/ARA12265/2020,France/ARA12973/2020
Mohamed Ahmed Ali et al	2	SARS-CoV-2 Genome Analysis of Japanese Travelers in Nile River Cruise	unknown	https://dx.doi.org/10.3389/fmicb.2020.01316	Egypt/NRC-01/2020,Egypt/NRC-03/2020
Virginia DCLS et al	3	unknown	unknown	unknown	USA/VA-DCLS-0041/2020,USA/VA-DCLS-0033/2020,USA/VA-DCLS-0038/2020
Le Tung Lam et al	1	WHOLE-GENOME SEQUENCING AND DE NOVO ASSEMBLY OF A 2019 NOVEL CORONAVIRUS (SARS-COV-2) STRAIN ISOLATED IN VIETNAM	unknown	https://www.biorxiv.org/content/10.1101/2020.06.12.149377v1	Vietnam/IBT-14Mar/2020
V. Caro et al	2	unknown	unknown	unknown	France/CIBU200132/2020,France/CIBU200107/2020
M̩lanie Albert et al C	6	unknown	unknown	unknown	France/B5465/2020,France/HF1465/2020,Algeria/G0860_2262/2020,Algeria/G0638_2264/2020,Algeria/G0640_2265/2020,France/IDF3518/2020
Peter M. Thielen et al	2	unknown	unknown	unknown	USA/MD-HP00132/2020,USA/DC-HP00139/2020
Baumeister E. et al	3	COVID-19 in Latin America: Contrasting phylodynamic inference with epidemiological surveillance.	unknown	https://dx.doi.org/10.1101/2020.05.23.20111443	Argentina/C1374/2020,Argentina/C121/2020,Argentina/C3013/2020
Tsuyoshi Sekizuka et al D	11	SARS-CoV-2 Genome Analysis of Japanese Travelers in Nile River Cruise	unknown	https://dx.doi.org/10.3389/fmicb.2020.01316	Japan/P3-1/2020,Japan/P3-2/2020,Japan/P2-1/2020,Japan/P4-4/2020,Japan/P5-3/2020,Japan/P4-8/2020,Japan/P4-6/2020,Japan/P4-7/2020,Japan/P4-3/2020,Japan/P5-1/2020,Japan/P5-2/2020
Keith Durkin et al B	4	A phylodynamic workflow to rapidly gain insights into the dispersal history and dynamics of SARS-CoV-2 lineages	unknown	https://dx.doi.org/10.1101/2020.05.05.078758	Belgium/ULG-6732/2020,Belgium/ULG-8715/2020,Belgium/ULG-8543/2020,Belgium/ULG-8810/2020
Handrick et al	1	unknown	unknown	unknown	Tunisia/MHT_1/2020
Draper J et al	1	Revealing COVID-19 Transmission by SARS-CoV-2 Genome Sequencing and Agent Based Modelling	unknown	https://dx.doi.org/10.1101/2020.04.19.048751	Australia/NSW170/2020
Albarrag et al	1	unknown	unknown	unknown	SaudiArabia/SCDC-3324/2020
Sara Mfarrej et al	1	unknown	unknown	unknown	SaudiArabia/KAUST-Makkah19/2020
Lin Qi et al	2	unknown	unknown	unknown	Fujian/IM3520013T/2020,Fujian/IM3520001T/2020
S. Wesley Long et al	1	Molecular Architecture of Early Dissemination and Evolution of the SARS-CoV-2 Virus in Metropolitan Houston, Texas	unknown	https://dx.doi.org/10.1101/2020.05.01.072652	USA/TX-HMH067/2020
Lenka Kramn<cc><c1> et al	3	unknown	unknown	unknown	CzechRepublic/2282/2020,CzechRepublic/2556/2020,CzechRepublic/2122/2020
Alexander Nagy et al	3	unknown	unknown	unknown	CzechRepublic/2741/2020,CzechRepublic/NRL_2615/2020,CzechRepublic/951/2020
Speranskaya AS et al	1	unknown	unknown	unknown	Russia/CRIE156278/2020
Christian Beisel et al	10	unknown	unknown	unknown	Switzerland/100097/2020,Switzerland/100073/2020,Switzerland/100138/2020,Switzerland/100065/2020,Switzerland/100048/2020,Switzerland/100047/2020,Switzerland/100030/2020,Switzerland/100144/2020,Switzerland/100083/2020,Switzerland/100125/2020
Sjaarda CP et al	2	unknown	unknown	unknown	Canada/ON_QGLO-02/2020,Canada/ON_QGLO-01/2020
Katherine Laiton-Donato et al B	1	unknown	unknown	unknown	Colombia/INS-80191/2020
Maria Aguero-Rosenfeld et al	1	Sequencing identifies multiple, early introductions of SARS-CoV2 to New York City Region	unknown	https://dx.doi.org/10.1101/2020.04.15.20064931	USA/NY-NYUMC68/2020
Matt Plumb et al	1	unknown	unknown	unknown	USA/MN66-MDH66/2020
Ana S. Gonzalez-Reiche et al B	1	unknown	unknown	unknown	USA/NY-PV09446/2020
Morten Rasmussen et al	2	unknown	unknown	unknown	Denmark/SSI-01/2020,Denmark/SSI-02/2020
Oluniyi P.E. et al	1	First African SARS-CoV-2 genome sequence from Nigerian COVID-19 case	unknown	https://virological.org/t/first-african-sars-cov-2-genome-sequence-from-nigerian-covid-19-case/421	Nigeria/Lagos01/2020
Michael Carr et al	7	unknown	unknown	unknown	Ireland/Dublin-22361/2020,Ireland/21023/2020,Ireland/Dublin-22428/2020,Ireland/Dublin-19072/2020,Ireland/Limerick-19935/2020,Ireland/Limerick-19933/2020,Ireland/Limerick-19934/2020
Carlos Padilla Rojas et al	1	COVID-19 in Latin America: Contrasting phylodynamic inference with epidemiological surveillance.	unknown	https://dx.doi.org/10.1101/2020.05.23.20111443	Peru/010/2020
Laubscher F. et al	7	unknown	unknown	unknown	Switzerland/VD0503/2020,Switzerland/GR2988/2020,Switzerland/GR3043/2020,Switzerland/GE1422/2020,Switzerland/GE1402/2020,Switzerland/BE6651/2020,Switzerland/GE0199/2020
Mu̱oz-Medina JE et al	1	Genomic analysis of early SARS-CoV-2 strains introduced in Mexico	unknown	https://dx.doi.org/10.1101/2020.05.27.120402	Mexico/Chihuahua-IMSS_01/2020
Nurdyana Abdul Rahman et al	1	unknown	unknown	unknown	Singapore/324/2020
Ivars Silami<80><e1>elis et al	5	unknown	unknown	unknown	Latvia/013/2020,Latvia/014/2020,Latvia/015/2020,Latvia/017/2020,Latvia/010/2020
Jan Richter et al	1	unknown	unknown	unknown	Cyprus/004/2020
Joan Marti-Carerras et al	3	A phylodynamic workflow to rapidly gain insights into the dispersal history and dynamics of SARS-CoV-2 lineages	unknown	https://dx.doi.org/10.1101/2020.05.05.078758	Belgium/VBK-03061/2020,Belgium/FR-03029/2020,Belgium/VI-03027/2020
Tony Wawina-Bokalanga et al	1	unknown	unknown	unknown	Belgium/Rega-0316260/2020
Claudio Tavares Sacchi et al A	1	unknown	unknown	unknown	Brazil/SPBR-14/2020
Stefan Schmutz et al B	4	A doubt of multiple introduction of SARS-CoV-2 in Italy: A preliminary overview	unknown	https://dx.doi.org/10.1002/jmv.25773	Switzerland/1000477757/2020,Switzerland/1000477806/2020,Switzerland/1000477797/2020,Switzerland/1000477796/2020
Stefan Schmutz et al C	1	Phylodynamic Analyses based on 11 genomes from the Italian outbreak	unknown	https://virological.org/t/phylodynamic-analyses-based-on-11-genomes-from-the-italian-outbreak/426	Switzerland/1000477377/2020
Sesay et al et al B	2	unknown	unknown	unknown	Gambia/0278/2020,Gambia/0268/2020
McHugh M et al	1	Preliminary analysis of SARS-CoV-2 importation & establishment of UK transmission lineages	unknown	https://virological.org/t/preliminary-analysis-of-sars-cov-2-importation-establishment-of-uk-transmission-lineages/507	Scotland/EDB120/2020
Zeeshan Chaudhry et al	1	unknown	unknown	unknown	Croatia/ZG-297-20/2020
Arne Kotz et al	1	unknown	unknown	unknown	Sweden/20-08143/2020
Alexey Shchetinin et al	2	unknown	unknown	unknown	Russia/Moscow_PMVL-1/2020,Russia/Moscow_PMVL-7/2020
Santos et al	2	Evolution and epidemic spread of SARS-CoV-2 in Brazil	unknown	https://dx.doi.org/10.1101/2020.06.11.20128249	Brazil/AC162535-IEC/2020,Brazil/PA161548-IEC/2020
Nabaes Jodar et al	1	COVID-19 in Latin America: Contrasting phylodynamic inference with epidemiological surveillance.	unknown	https://dx.doi.org/10.1101/2020.05.23.20111443	Argentina/PAIS_A001/2020
Paola Resende et al B	1	Genomic surveillance of SARS-CoV-2 reveals community transmission of a major lineage during the early pandemic phase in Brazil	unknown	https://virological.org/t/genomic-surveillance-of-sars-cov-2-reveals-community-transmission-of-a-major-lineage-during-the-early-pandemic-phase-in-brazil/514	Brazil/RJ-763/2020
Paola Resende et al C	2	Evolution and epidemic spread of SARS-CoV-2 in Brazil	unknown	https://dx.doi.org/10.1101/2020.06.11.20128249	Brazil/DF-862/2020,Brazil/DF-861/2020
Cusi et al	1	unknown	unknown	unknown	Italy/Siena-1/2020
Marcela Mercado-Reyes et al	1	Substitutions in Spike and Nucleocapsid proteins of SARS-CoV-2 circulating in Colombia	unknown	https://dx.doi.org/10.1101/2020.06.02.20120782	Colombia/Bogota78390/2020
Sunil Raghav et al	1	unknown	unknown	unknown	India/RMRC2/2020
Oskar Karlsson Lindsjo et al	2	unknown	unknown	unknown	Sweden/20-08089/2020,Sweden/20-08687/2020
Ramirez-Gonzalez Ernesto et al	2	unknown	unknown	unknown	Mexico/CDMX-InDRE_08/2020,Mexico/CDMX-InDRE_07/2020
Adelaide Milani et al	1	unknown	unknown	unknown	Italy/VR_20COV11-181/2020
Lenka Kramna et al	3	unknown	unknown	unknown	CzechRepublic/Seq5/2020,CzechRepublic/Seq3/2020,CzechRepublic/Seq7/2020
Arindam Maitra et al	1	Phylogenetic clustering of the Indian SARS-CoV-2 genomes reveals the presence of distinct clades of viral haplotypes among states	unknown	https://www.biorxiv.org/content/10.1101/2020.05.28.122143v1	India/S3/2020
Cesare E. M. Gruber et al	1	unknown	unknown	unknown	Italy/INMI4/2020
Antonino Di Caro et al	2	unknown	unknown	unknown	Italy/CR-9491-26Feb/2020,Italy/MI-5925-22Feb/2020
Sim E et al	1	Revealing COVID-19 Transmission by SARS-CoV-2 Genome Sequencing and Agent Based Modelling	unknown	https://dx.doi.org/10.1101/2020.04.19.048751	Australia/NSW161/2020
Licastro D et al	1	Isolation and Full-Length Genome Characterization of SARS-CoV-2 from COVID-19 Cases in Northern Italy	unknown	https://dx.doi.org/10.1128/JVI.00543-20	Italy/FVG-ICGEB_S9/2020
Katarina Jarbur et al	1	unknown	unknown	unknown	Sweden/20-06169/2020
Claudio Tavares Sacchi et al B	1	Importation and early local transmission of COVID-19 in Brazil, 2020	unknown	https://dx.doi.org/10.1590/s1678-9946202062030	Brazil/SPBR-06/2020
Kazuo Imai et al	2	unknown	unknown	unknown	Japan/SMU-0311S2/2020,Japan/SMU-0311S3/2020
Chun Hang AU et al	2	unknown	unknown	unknown	HongKong/HKSH0003/2020,HongKong/HKSH0004/2020
Vasiliki Pogka et al	1	unknown	unknown	unknown	Greece/127_HPI/2020
Samo Zakotnik et al	1	unknown	unknown	unknown	Slovenia/4584/2020
Parisi A. et al	1	unknown	unknown	unknown	Italy/IZSPB_1259/2020
Bal et al B	2	unknown	unknown	unknown	France/Clermont-Ferrand_650/2020,France/Pollionay_1733/2020
Thushan de Silva et al	1	Preliminary analysis of SARS-CoV-2 importation & establishment of UK transmission lineages	unknown	https://virological.org/t/preliminary-analysis-of-sars-cov-2-importation-establishment-of-uk-transmission-lineages/507	England/SHEF-CFB57/2020
