# Supplementary material for: SARS-CoV-2 outbreak in a tri-national urban area is dominated by a B.1 lineage variant linked to a mass gathering event
Source: PLOS journal article supplement (doi:10.1371/journal.ppat.1009374), 2021-03-19
Supplement: S8 (10.1371/journal.ppat.1009374.s008) [file journal.ppat.1009374.s008.pdf]

**Table S2. Diversity indices for SARS-CoV-2 lineages in Switzerland and neighbouring countries for the time period of first detected case until March 23<sup>rd</sup>, 2020.**

| <b>Country</b>     | <b>Coefficient of co-variation</b> | <b>Shannon Entropy H'</b> | <b>Shannon Diversity</b> | <b>Simpson Concentration Index D'</b> | <b>Simpson Diversity</b> |
|--------------------|------------------------------------|---------------------------|--------------------------|---------------------------------------|--------------------------|
| <b>Austria</b>     | 1.654                              | 1.704                     | 5.496                    | 0.265                                 | 3.772                    |
| <b>France</b>      | 1.987                              | 0.656                     | 1.927                    | 0.701                                 | 1.426                    |
| <b>Germany</b>     | 1.305                              | 1.654                     | 5.226                    | 0.246                                 | 4.066                    |
| <b>Italy</b>       | 0.749                              | 1.067                     | 2.908                    | 0.396                                 | 2.523                    |
| <b>Switzerland</b> | 2.783                              | 0.866                     | 2.377                    | 0.622                                 | 1.609                    |
